# Supplementary material
Source: PubMed Central journal article supplement (PMC6361596)
Supplement: ijvr-19-262.s002.pdf [file ijvr-19-262.s002.pdf]

**ST2:** List of the predicted transcription factor binding sites occurring at miR-21 TSS

| Sequence name | Factor name                 | Start position | End position | Dissimilarity | String        | RE equally | RE query |
|---------------|-----------------------------|----------------|--------------|---------------|---------------|------------|----------|
| Sequence      | Ik-1 [T02702]               | 715            | 727          | 2.374299      | CAAAGTGCTGGGA | 0.00027    | 0.00013  |
| Sequence      | RelA [T00594]               | 400            | 410          | 1.189568      | ATGGGAAACTC   | 0.00167    | 0.00133  |
| Sequence      | RBP-Jkappa [T01616]         | 397            | 408          | 7.907372      | GAAATGGGAAAC  | 0.00262    | 0.00245  |
| Sequence      | IRF-1 [T00423]              | 357            | 365          | 0             | AAAGGGAAA     | 0.00335    | 0.00567  |
| Sequence      | NF-kappaB [T00590]          | 401            | 412          | 11.379879     | TGGGAAACTCGA  | 0.009      | 0.00704  |
| Sequence      | RBP-Jkappa [T01616]         | 155            | 166          | 11.437181     | ACTTCCCAAGTG  | 0.00754    | 0.00781  |
| Sequence      | RBP-Jkappa [T01616]         | 262            | 273          | 8.425028      | CCCATGGGAAAA  | 0.00911    | 0.00841  |
| Sequence      | T3R-beta1 [T00851]          | 654            | 662          | 11.145411     | TCACCGTGT     | 0.0134     | 0.00841  |
| Sequence      | CTF [T00174]                | 79             | 90           | 6.387815      | GAGCCAATGGAA  | 0.00879    | 0.00846  |
| Sequence      | RBP-Jkappa [T01616]         | 6              | 17           | 9.774182      | CTACTGGGAAAT  | 0.00963    | 0.00874  |
| Sequence      | HNF-4alpha [T03828]         | 195            | 207          | 10.773603     | CAAAGTATTAGAC | 0.00714    | 0.01072  |
| Sequence      | Sp1 [T00759]                | 694            | 703          | 4.333247      | GATCCGCCCG    | 0.03768    | 0.01364  |
| Sequence      | RelA [T00594]               | 9              | 19           | 10.920625     | CTGGGAAATTT   | 0.01633    | 0.01375  |
| Sequence      | USF1 [T00874]               | 604            | 613          | 4.779174      | CACGTGCCAC    | 0.0201     | 0.01398  |
| Sequence      | POU2F2 (Oct-2.1) [T00646]   | 25             | 35           | 7.84518       | TGTCTTAGACT   | 0.00754    | 0.01398  |
| Sequence      | HIF-1 [T01609]              | 605            | 613          | 2.735708      | ACGTGCCAC     | 0.0201     | 0.01428  |
| Sequence      | STAT5A [T04683]             | 332            | 344          | 9.952027      | TCTTTTCTGTAAA | 0.00824    | 0.01506  |
| Sequence      | STAT5A [T04683]             | 637            | 649          | 9.952027      | TTAATAGAAACAG | 0.00824    | 0.01506  |
| Sequence      | RelA [T00594]               | 265            | 275          | 11.73191      | ATGGGAAAATG   | 0.01758    | 0.01515  |
| Sequence      | POU2F2 (Oct-2.1) [T00646]   | 165            | 175          | 10.353601     | TGGATTAAAAA   | 0.01005    | 0.01552  |
| Sequence      | HNF-4alpha [T03828]         | 715            | 727          | 12.669538     | CAAAGTGCTGGGA | 0.01209    | 0.01687  |
| Sequence      | RelA [T00594]               | 411            | 421          | 14.684224     | GAGGGAAGCAC   | 0.02345    | 0.01834  |
| Sequence      | USF1 [T00874]               | 600            | 609          | 4.038983      | CAGGCACGTG    | 0.03517    | 0.0214   |
| Sequence      | SRY [T00997]                | 191            | 199          | 0             | ATAACAAAG     | 0.0134     | 0.02217  |
| Sequence      | Elk-1 [T00250]              | 156            | 164          | 13.824493     | CTTCCCAAG     | 0.0201     | 0.02231  |
| Sequence      | POU2F2 (Oct-2.1) [T00646]   | 851            | 861          | 5.123481      | TGTTTTAAAAA   | 0.01068    | 0.02287  |
| Sequence      | T3R-beta1 [T00851]          | 211            | 219          | 1.110682      | CTGAGGTGA     | 0.03349    | 0.02299  |
| Sequence      | HIF-1 [T01609]              | 600            | 608          | 1.730353      | CAGGCACGT     | 0.04019    | 0.0242   |
| Sequence      | STAT1beta [T01573]          | 8              | 17           | 2.898434      | ACTGGGAAAT    | 0.02261    | 0.02535  |
| Sequence      | RAR-beta:RXR-alpha [T05420] | 553            | 564          | 12.463326     | GGGTTCAAGCGA  | 0.05746    | 0.02822  |
| Sequence      | HNF-4alpha [T03828]         | 454            | 466          | 14.354411     | TTTTTGTTCTTTG | 0.0229     | 0.0311   |

|          |                               |     |     |           |             |         |         |
|----------|-------------------------------|-----|-----|-----------|-------------|---------|---------|
| Sequence | NF-AT1 [T01948]               | 86  | 95  | 5.512555  | TGGAAAGTAA  | 0.02596 | 0.03134 |
| Sequence | IRF-1 [T00423]                | 8   | 16  | 4.549799  | ACTGGGAAA   | 0.02345 | 0.03249 |
| Sequence | Elk-1 [T00250]                | 410 | 418 | 9.754368  | CGAGGGAAAG  | 0.04689 | 0.03311 |
| Sequence | p53 [T00671]                  | 745 | 751 | 4.645444  | CGCGCCC     | 0.10718 | 0.03485 |
| Sequence | AP-1 [T00029]                 | 217 | 225 | 14.821833 | TGACTTGAA   | 0.04019 | 0.03649 |
| Sequence | NF-AT2 [T01945]               | 268 | 277 | 10.887961 | GGAAAATGAT  | 0.03014 | 0.0376  |
| Sequence | PXR-1:RXR-alpha [T05671]      | 552 | 559 | 4.213958  | CGGGTTCA    | 0.05359 | 0.04027 |
| Sequence | IRF-1 [T00423]                | 83  | 91  | 3.602021  | CAATGGAAA   | 0.03014 | 0.04051 |
| Sequence | LEF-1 [T02905]                | 799 | 806 | 2.345041  | CTTTGCTG    | 0.04019 | 0.04346 |
| Sequence | NF-AT2 [T01945]               | 87  | 96  | 10.644445 | GGAAAGTAAT  | 0.03684 | 0.04557 |
| Sequence | HNF-3alpha [T02512]           | 633 | 640 | 1.342935  | TATTTTAA    | 0.0134  | 0.04642 |
| Sequence | PXR-1:RXR-alpha [T05671]      | 311 | 318 | 1.63615   | TGAACTTT    | 0.02679 | 0.04656 |
| Sequence | NF-AT1 [T00550]               | 361 | 369 | 10.06774  | GGAAATGAC   | 0.05359 | 0.04713 |
| Sequence | NF-AT1 [T00550]               | 403 | 411 | 10.170774 | GGAAACTCG   | 0.05359 | 0.04713 |
| Sequence | MEF-2A [T01005]               | 248 | 258 | 7.982343  | TATTTTTCTTT | 0.01758 | 0.0481  |
| Sequence | NF-AT1 [T00550]               | 268 | 276 | 8.532897  | GGAAAATGA   | 0.04689 | 0.05012 |
| Sequence | RAR-beta [T00721]             | 552 | 561 | 4.326039  | CGGGTTCAAG  | 0.06364 | 0.05054 |
| Sequence | RAR-beta [T00721]             | 648 | 657 | 4.252176  | AGGGTTTCAC  | 0.06364 | 0.05054 |
| Sequence | PPAR-alpha:RXR-alpha [T05221] | 497 | 507 | 14.659739 | TTGCCCAAGTT | 0.06782 | 0.05126 |
| Sequence | IRF-1 [T00423]                | 399 | 407 | 2.93326   | AATGGGAAA   | 0.03349 | 0.05424 |
| Sequence | PEA3 [T00685]                 | 376 | 384 | 4.30818   | AGGATGAGT   | 0.06029 | 0.05746 |
| Sequence | NF-AT2 [T01945]               | 12  | 21  | 9.905562  | GGAAATTTGT  | 0.03852 | 0.05769 |
| Sequence | T3R-beta1 [T00851]            | 259 | 267 | 6.664094  | TCACCCATG   | 0.09378 | 0.05852 |
| Sequence | TCF-4E [T02878]               | 799 | 805 | 0         | CTTTGCT     | 0.05359 | 0.0608  |
| Sequence | IRF-1 [T00423]                | 264 | 272 | 5.006272  | CATGGGAAA   | 0.05694 | 0.06114 |
| Sequence | HNF-1B [T01950]               | 102 | 110 | 10.655798 | TGTTACATA   | 0.03684 | 0.06124 |
| Sequence | HNF-1C [T01951]               | 176 | 184 | 12.481385 | GTTAAAACT   | 0.04019 | 0.06533 |
| Sequence | HNF-1C [T01951]               | 661 | 669 | 12.499603 | GTTAGCCAG   | 0.04019 | 0.06533 |
| Sequence | RAR-beta [T00721]             | 466 | 475 | 9.622793  | GGGGTTTTTTT | 0.09378 | 0.06734 |
| Sequence | NF-1 [T00539]                 | 497 | 504 | 6.722386  | TTGCCCAA    | 0.10718 | 0.06872 |
| Sequence | E2F-1 [T01542]                | 693 | 700 | 10.134154 | TGATCCGC    | 0.14737 | 0.06899 |
| Sequence | NF-1 [T00539]                 | 527 | 534 | 4.135372  | TTGGCTCA    | 0.10718 | 0.06974 |
| Sequence | NFI/CTF [T00094]              | 82  | 89  | 5.021086  | CCAATGGA    | 0.10718 | 0.07058 |

|          |                           |     |     |           |             |         |         |
|----------|---------------------------|-----|-----|-----------|-------------|---------|---------|
| Sequence | E2F-1 [T01542]            | 540 | 547 | 12.813402 | ACCTCCGC    | 0.20096 | 0.07366 |
| Sequence | STAT1beta [T01573]        | 357 | 366 | 9.807397  | AAAGGGAAAT  | 0.06531 | 0.07527 |
| Sequence | POU2F2 (Oct-2.1) [T00646] | 236 | 246 | 14.505223 | TGATTTTCACT | 0.03391 | 0.07816 |
| Sequence | E2F-1 [T01542]            | 697 | 704 | 11.888116 | CCGCCCGC    | 0.20096 | 0.07989 |
| Sequence | SRY [T00997]              | 352 | 360 | 13.352057 | GAGGCAAAG   | 0.10718 | 0.08389 |
| Sequence | SRY [T00997]              | 462 | 470 | 13.352057 | CTTTGGGGT   | 0.10718 | 0.08389 |
| Sequence | SRY [T00997]              | 711 | 719 | 13.352057 | CTCCCAAAG   | 0.10718 | 0.08389 |
| Sequence | VDR [T00885]              | 555 | 563 | 3.462841  | GTTCAAGCG   | 0.09378 | 0.08403 |
| Sequence | LEF-1 [T02905]            | 22  | 29  | 9.72404   | CTTTGTCT    | 0.09378 | 0.09254 |
| Sequence | LEF-1 [T02905]            | 353 | 360 | 9.72404   | AGGCAAAG    | 0.09378 | 0.09254 |
| Sequence | LEF-1 [T02905]            | 462 | 469 | 9.313676  | CTTTGGGG    | 0.09378 | 0.09254 |
| Sequence | NF-1 [T00539]             | 156 | 163 | 8.790071  | CTTCCCAA    | 0.10718 | 0.09638 |
| Sequence | NF-1 [T00539]             | 579 | 586 | 8.790071  | CCTCCCAA    | 0.10718 | 0.09638 |
| Sequence | NF-1 [T00539]             | 710 | 717 | 8.790071  | CCTCCCAA    | 0.10718 | 0.09638 |
| Sequence | NF-Y [T00150]             | 143 | 150 | 2.420868  | ATTGGTAG    | 0.09378 | 0.09653 |
| Sequence | RXR-alpha [T01345]        | 553 | 559 | 0         | GGGTTCA     | 0.10718 | 0.09656 |
| Sequence | NF-AT1 [T00550]           | 87  | 95  | 7.744746  | GGAAAGTAA   | 0.08708 | 0.09705 |
| Sequence | p53 [T00671]              | 696 | 702 | 5.133514  | TCCGCC      | 0.21436 | 0.09784 |
| Sequence | STAT1beta [T01573]        | 399 | 408 | 14.492168 | AATGGGAAAC  | 0.09043 | 0.09929 |
| Sequence | NF-1 [T00539]             | 706 | 713 | 8.191058  | TTGGCCTC    | 0.10718 | 0.1004  |
| Sequence | c-Ets-1 [T00112]          | 412 | 418 | 5.686398  | AGGGAAG     | 0.16077 | 0.10046 |
| Sequence | RXR-alpha [T01345]        | 467 | 473 | 3.170788  | GGGTTTT     | 0.10718 | 0.1005  |
| Sequence | NF-AT1 [T00550]           | 12  | 20  | 9.042733  | GGAAATTTG   | 0.10048 | 0.10476 |
| Sequence | NF-Y [T00150]             | 79  | 86  | 2.12821   | GAGCCAAT    | 0.09378 | 0.10618 |
| Sequence | c-Myb [T00137]            | 679 | 686 | 6.04018   | AAACTGAC    | 0.09378 | 0.1066  |
| Sequence | p53 [T00671]              | 496 | 502 | 3.024997  | GTTGCC      | 0.21436 | 0.10711 |
| Sequence | p53 [T00671]              | 803 | 809 | 2.813291  | GCTGCC      | 0.21436 | 0.10711 |
| Sequence | GCF [T00320]              | 741 | 749 | 5.917256  | CCACCGCGC   | 0.28134 | 0.11041 |
| Sequence | HNF-1C [T01951]           | 39  | 47  | 14.531284 | AAGTGTAAC   | 0.07703 | 0.11759 |
| Sequence | GR [T05076]               | 20  | 26  | 5.207533  | GTCTTTG     | 0.10718 | 0.12086 |
| Sequence | LEF-1 [T02905]            | 192 | 199 | 2.004405  | TAACAAAG    | 0.08038 | 0.12301 |
| Sequence | c-Myb [T00137]            | 501 | 508 | 6.539977  | CCAAGTTG    | 0.13397 | 0.1239  |
| Sequence | c-Myb [T00137]            | 809 | 816 | 6.454077  | CTCAGTTG    | 0.13397 | 0.1239  |

|          |                     |     |     |           |           |         |         |
|----------|---------------------|-----|-----|-----------|-----------|---------|---------|
| Sequence | Pax-5 [T00070]      | 745 | 751 | 1.537547  | CGCGCCC   | 0.32153 | 0.12732 |
| Sequence | c-Myc [T00140]      | 604 | 609 | 0         | CACGTG    | 0.21436 | 0.13757 |
| Sequence | AP-2alphaA [T00035] | 351 | 356 | 2.550491  | TGAGGC    | 0.21436 | 0.13758 |
| Sequence | AP-2alphaA [T00035] | 572 | 577 | 2.550491  | GCCTCA    | 0.21436 | 0.13758 |
| Sequence | ATF3 [T01313]       | 825 | 832 | 6.744803  | TGACATCA  | 0.12057 | 0.13867 |
| Sequence | HNF-1C [T01951]     | 103 | 111 | 8.002145  | GTTACATAG | 0.08708 | 0.14043 |
| Sequence | HNF-1B [T01950]     | 387 | 395 | 13.422482 | ACAATAACC | 0.10383 | 0.14245 |
| Sequence | HNF-1C [T01951]     | 386 | 394 | 9.601936  | AACAATAAC | 0.08708 | 0.14282 |
| Sequence | E2F-1 [T01542]      | 740 | 747 | 13.578236 | GCCACCCGC | 0.32153 | 0.14301 |
| Sequence | ENKTF-1 [T00255]    | 749 | 756 | 8.19852   | CCCGGCCA  | 0.32153 | 0.15498 |
| Sequence | c-Ets-1 [T00112]    | 156 | 162 | 5.814485  | CTTCCCA   | 0.16077 | 0.15542 |
| Sequence | RXR-alpha [T01345]  | 74  | 80  | 5.271235  | GGGTAGA   | 0.26794 | 0.1602  |
| Sequence | SRY [T00997]        | 22  | 30  | 7.175614  | CTTTGTCTT | 0.13397 | 0.16163 |
| Sequence | SRY [T00997]        | 799 | 807 | 7.175614  | CTTTGCTGC | 0.13397 | 0.16163 |
| Sequence | NF-1 [T00539]       | 78  | 85  | 6.948522  | AGAGCCAA  | 0.21436 | 0.17023 |
| Sequence | NF-1 [T00539]       | 445 | 452 | 6.948522  | TTGGTTCG  | 0.21436 | 0.17023 |
| Sequence | c-Myb [T00137]      | 180 | 187 | 8.728118  | AAACTTAC  | 0.13397 | 0.17967 |
| Sequence | ATF3 [T01313]       | 683 | 690 | 10.117205 | TGACCTCA  | 0.17416 | 0.19022 |
| Sequence | c-Jun [T00133]      | 825 | 831 | 7.538568  | TGACATC   | 0.21436 | 0.1942  |
| Sequence | AP-2alphaA [T00035] | 599 | 604 | 0.226186  | CCAGGC    | 0.42871 | 0.19671 |
| Sequence | AP-2alphaA [T00035] | 666 | 671 | 0.226186  | CCAGGC    | 0.42871 | 0.19671 |
| Sequence | AP-2alphaA [T00035] | 546 | 551 | 1.871933  | GCCTCC    | 0.42871 | 0.19693 |
| Sequence | AP-2alphaA [T00035] | 578 | 583 | 1.871933  | GCCTCC    | 0.42871 | 0.19693 |
| Sequence | AP-2alphaA [T00035] | 709 | 714 | 1.871933  | GCCTCC    | 0.42871 | 0.19693 |
| Sequence | PR B [T00696]       | 760 | 766 | 0         | CACTGTT   | 0.16077 | 0.19738 |
| Sequence | PR B [T00696]       | 835 | 841 | 8.827054  | AACAGAT   | 0.16077 | 0.19738 |
| Sequence | PR B [T00696]       | 860 | 866 | 8.827054  | AACAGCT   | 0.16077 | 0.19738 |
| Sequence | PR A [T01661]       | 760 | 766 | 0         | CACTGTT   | 0.16077 | 0.19738 |
| Sequence | PR A [T01661]       | 835 | 841 | 8.827054  | AACAGAT   | 0.16077 | 0.19738 |
| Sequence | PR A [T01661]       | 860 | 866 | 8.827054  | AACAGCT   | 0.16077 | 0.19738 |
| Sequence | NFI/CTF [T00094]    | 160 | 167 | 8.814757  | CCAAGTGG  | 0.21436 | 0.19908 |
| Sequence | TCF-4E [T02878]     | 22  | 28  | 12.604771 | CTTTGTC   | 0.21436 | 0.20483 |
| Sequence | TCF-4E [T02878]     | 462 | 468 | 12.604771 | CTTTGGG   | 0.21436 | 0.20483 |

|          |                     |     |     |           |             |         |         |
|----------|---------------------|-----|-----|-----------|-------------|---------|---------|
| Sequence | TCF-4E [T02878]     | 713 | 719 | 12.604771 | CCCAAAG     | 0.21436 | 0.20483 |
| Sequence | NFI/CTF [T00094]    | 818 | 825 | 5.558661  | CCAAACAT    | 0.24115 | 0.20964 |
| Sequence | NFI/CTF [T00094]    | 292 | 299 | 9.352332  | CCAAGGCT    | 0.24115 | 0.20993 |
| Sequence | c-Myb [T00137]      | 44  | 51  | 8.947824  | TAACTTCT    | 0.17416 | 0.2111  |
| Sequence | c-Ets-1 [T00112]    | 85  | 91  | 6.295602  | ATGGAAA     | 0.21436 | 0.22059 |
| Sequence | ENKTF-1 [T00255]    | 775 | 782 | 5.687009  | TGGCCTTG    | 0.32153 | 0.22114 |
| Sequence | VDR [T00885]        | 307 | 315 | 6.925682  | TAGCTGAAC   | 0.18756 | 0.22251 |
| Sequence | c-Jun [T00133]      | 217 | 223 | 6.668031  | TGACTTG     | 0.26794 | 0.22277 |
| Sequence | MEF-2A [T01005]     | 633 | 643 | 14.541822 | TATTTTAATAG | 0.10404 | 0.22729 |
| Sequence | NF-1 [T00539]       | 144 | 151 | 11.603221 | TTGGTAGA    | 0.21436 | 0.2328  |
| Sequence | c-Jun [T00133]      | 366 | 372 | 7.937147  | TGACTAG     | 0.21436 | 0.23352 |
| Sequence | c-Jun [T00133]      | 683 | 689 | 8.242207  | TGACCTC     | 0.21436 | 0.23352 |
| Sequence | c-Myb [T00137]      | 320 | 327 | 11.712811 | AAACTTAG    | 0.18756 | 0.24021 |
| Sequence | RXR-alpha [T01345]  | 258 | 264 | 2.544678  | TTCACCC     | 0.37512 | 0.2542  |
| Sequence | NFI/CTF [T00094]    | 460 | 467 | 10.579747 | TTCTTTGG    | 0.29474 | 0.25604 |
| Sequence | NFI/CTF [T00094]    | 702 | 709 | 10.579747 | CGCCTTGG    | 0.29474 | 0.25604 |
| Sequence | NFI/CTF [T00094]    | 714 | 721 | 10.579747 | CCAAAGTG    | 0.29474 | 0.25604 |
| Sequence | ATF3 [T01313]       | 217 | 224 | 13.489607 | TGACTTGA    | 0.24115 | 0.26297 |
| Sequence | ATF3 [T01313]       | 815 | 822 | 13.489607 | TGACCAA     | 0.24115 | 0.26297 |
| Sequence | NF-1 [T00539]       | 814 | 821 | 9.535536  | TTGACCAA    | 0.32153 | 0.2669  |
| Sequence | HOXD9 [T01424]      | 627 | 636 | 10.220007 | TTTTTGTATT  | 0.10215 | 0.26765 |
| Sequence | HOXD9 [T01424]      | 639 | 648 | 10.220007 | AATAGAAACA  | 0.10215 | 0.26765 |
| Sequence | HOXD10 [T01425]     | 627 | 636 | 10.220007 | TTTTTGTATT  | 0.10215 | 0.26765 |
| Sequence | HOXD10 [T01425]     | 639 | 648 | 10.220007 | AATAGAAACA  | 0.10215 | 0.26765 |
| Sequence | NFI/CTF [T00094]    | 441 | 448 | 6.786076  | TTGTTTGG    | 0.32153 | 0.26885 |
| Sequence | STAT4 [T01577]      | 12  | 17  | 0         | GGAAAT      | 0.21436 | 0.27752 |
| Sequence | STAT4 [T01577]      | 361 | 366 | 0         | GGAAAT      | 0.21436 | 0.27752 |
| Sequence | AP-2alphaA [T00035] | 123 | 128 | 3.970052  | GCCTTG      | 0.42871 | 0.27778 |
| Sequence | AP-2alphaA [T00035] | 293 | 298 | 3.970052  | CAAGGC      | 0.42871 | 0.27778 |
| Sequence | AP-2alphaA [T00035] | 703 | 708 | 3.970052  | GCCTTG      | 0.42871 | 0.27778 |
| Sequence | AP-2alphaA [T00035] | 777 | 782 | 3.970052  | GCCTTG      | 0.42871 | 0.27778 |
| Sequence | LEF-1 [T02905]      | 712 | 719 | 8.973041  | TCCCAAAG    | 0.24115 | 0.28368 |
| Sequence | c-Ets-1 [T00112]    | 10  | 16  | 7.199436  | TGGGAAA     | 0.32153 | 0.28474 |

|          |                     |     |     |           |          |         |         |
|----------|---------------------|-----|-----|-----------|----------|---------|---------|
| Sequence | c-Ets-1 [T00112]    | 266 | 272 | 7.199436  | TGGGAAA  | 0.32153 | 0.28474 |
| Sequence | c-Ets-1 [T00112]    | 359 | 365 | 7.071349  | AGGGAAA  | 0.32153 | 0.28474 |
| Sequence | c-Ets-1 [T00112]    | 401 | 407 | 7.199436  | TGGGAAA  | 0.32153 | 0.28474 |
| Sequence | RXR-alpha [T01345]  | 649 | 655 | 4.019014  | GGGTTTC  | 0.42871 | 0.2864  |
| Sequence | c-Jun [T00133]      | 815 | 821 | 6.856451  | TGACCAA  | 0.32153 | 0.30344 |
| Sequence | Pax-5 [T00070]      | 496 | 502 | 9.552105  | GTTGCCC  | 0.64307 | 0.30795 |
| Sequence | Pax-5 [T00070]      | 696 | 702 | 9.552105  | TCCGCCC  | 0.64307 | 0.30795 |
| Sequence | c-Myb [T00137]      | 172 | 179 | 12.417209 | AAAAGTTA | 0.18756 | 0.31078 |
| Sequence | c-Myb [T00137]      | 312 | 319 | 12.417209 | GAACTTTA | 0.18756 | 0.31078 |
| Sequence | TCF-4E [T02878]     | 193 | 199 | 6.302385  | AACAAAG  | 0.26794 | 0.3126  |
| Sequence | TCF-4E [T02878]     | 354 | 360 | 6.302385  | GGCAAAG  | 0.26794 | 0.3126  |
| Sequence | HNF-1A [T00368]     | 176 | 183 | 0.781639  | GTTAAAAC | 0.21436 | 0.31816 |
| Sequence | C/EBPalpha [T00105] | 512 | 518 | 7.465744  | TGCAATG  | 0.21436 | 0.32674 |
| Sequence | TFII-I [T00824]     | 227 | 232 | 6.581441  | ATCTCC   | 0.42871 | 0.33221 |
| Sequence | TFII-I [T00824]     | 508 | 513 | 6.581441  | GGAGTG   | 0.42871 | 0.33221 |
| Sequence | GR [T05076]         | 427 | 433 | 0         | TTTTTTG  | 0.16077 | 0.33886 |
| Sequence | GR [T05076]         | 453 | 459 | 0         | TTTTTTG  | 0.16077 | 0.33886 |
| Sequence | GR [T05076]         | 471 | 477 | 0         | TTTTTTG  | 0.16077 | 0.33886 |
| Sequence | GR [T05076]         | 626 | 632 | 0         | TTTTTTG  | 0.16077 | 0.33886 |
| Sequence | NF-1 [T00539]       | 288 | 295 | 12.32643  | TAAACCAA | 0.32153 | 0.34387 |
| Sequence | NF-1 [T00539]       | 464 | 471 | 12.32643  | TTGGGGTT | 0.32153 | 0.34387 |
| Sequence | NF-1 [T00539]       | 506 | 513 | 12.32643  | TTGGAGTG | 0.32153 | 0.34387 |
| Sequence | c-Ets-1 [T00112]    | 596 | 602 | 8.809329  | ATTCCAG  | 0.37512 | 0.37193 |
| Sequence | ENKTF-1 [T00255]    | 517 | 524 | 6.942764  | TGGCGCGA | 0.64307 | 0.37546 |
| Sequence | ENKTF-1 [T00255]    | 77  | 84  | 11.374018 | TAGAGCCA | 0.4823  | 0.42328 |
| Sequence | ENKTF-1 [T00255]    | 528 | 535 | 11.374018 | TGGCTCAC | 0.4823  | 0.42328 |
| Sequence | ENKTF-1 [T00255]    | 736 | 743 | 11.374018 | GTGAGCCA | 0.4823  | 0.42328 |
| Sequence | Pax-5 [T00070]      | 803 | 809 | 8.014558  | GCTGCCC  | 0.9646  | 0.4535  |
| Sequence | GR [T05076]         | 432 | 438 | 3.763516  | TGTTTTG  | 0.32153 | 0.46335 |
| Sequence | GR [T05076]         | 437 | 443 | 3.763516  | TGTTTTG  | 0.32153 | 0.46335 |
| Sequence | GR [T05076]         | 460 | 466 | 3.763516  | TTCTTTG  | 0.32153 | 0.46335 |
| Sequence | XBP-1 [T00902]      | 365 | 370 | 0         | ATGACT   | 0.42871 | 0.4661  |
| Sequence | XBP-1 [T00902]      | 824 | 829 | 1.583727  | ATGACA   | 0.42871 | 0.47108 |

|          |                     |     |     |           |          |         |         |
|----------|---------------------|-----|-----|-----------|----------|---------|---------|
| Sequence | C/EBPalpha [T00105] | 81  | 87  | 7.00174   | GCCAATG  | 0.32153 | 0.48348 |
| Sequence | PR B [T00696]       | 657 | 663 | 9.743489  | CCGTGTT  | 0.4823  | 0.49677 |
| Sequence | PR B [T00696]       | 848 | 854 | 9.743489  | GTGTGTT  | 0.4823  | 0.49677 |
| Sequence | PR A [T01661]       | 657 | 663 | 9.743489  | CCGTGTT  | 0.4823  | 0.49677 |
| Sequence | PR A [T01661]       | 848 | 854 | 9.743489  | GTGTGTT  | 0.4823  | 0.49677 |
| Sequence | PR B [T00696]       | 99  | 105 | 8.338824  | TTCTGTT  | 0.4823  | 0.49869 |
| Sequence | PR B [T00696]       | 645 | 651 | 8.338824  | AACAGGG  | 0.4823  | 0.49869 |
| Sequence | PR A [T01661]       | 99  | 105 | 8.338824  | TTCTGTT  | 0.4823  | 0.49869 |
| Sequence | PR A [T01661]       | 645 | 651 | 8.338824  | AACAGGG  | 0.4823  | 0.49869 |
| Sequence | TFII-I [T00824]     | 87  | 92  | 0         | GGAAAG   | 0.64307 | 0.53777 |
| Sequence | GATA-1 [T00306]     | 226 | 231 | 0.105011  | TATCTC   | 0.42871 | 0.55444 |
| Sequence | GATA-1 [T00306]     | 837 | 842 | 0         | CAGATA   | 0.42871 | 0.55444 |
| Sequence | PR B [T00696]       | 116 | 122 | 11.636384 | AGTTGTT  | 0.32153 | 0.55675 |
| Sequence | PR B [T00696]       | 386 | 392 | 2.80933   | AACAATA  | 0.32153 | 0.55675 |
| Sequence | PR A [T01661]       | 116 | 122 | 11.636384 | AGTTGTT  | 0.32153 | 0.55675 |
| Sequence | PR A [T01661]       | 386 | 392 | 2.80933   | AACAATA  | 0.32153 | 0.55675 |
| Sequence | NFI/CTF [T00094]    | 523 | 530 | 13.146004 | GATCTTGG | 0.4823  | 0.59247 |
| Sequence | TFIID [T00820]      | 62  | 68  | 5.544826  | TCCTAAA  | 0.32153 | 0.60835 |
| Sequence | TFIID [T00820]      | 628 | 634 | 1.537547  | TTTTGTA  | 0.32153 | 0.6316  |
| Sequence | ER-alpha [T00261]   | 683 | 687 | 0         | TGACC    | 0.85742 | 0.66368 |
| Sequence | ER-alpha [T00261]   | 815 | 819 | 0         | TGACC    | 0.85742 | 0.66368 |
| Sequence | C/EBPalpha [T00105] | 142 | 148 | 4.776286  | TATTGGT  | 0.42871 | 0.66566 |
| Sequence | C/EBPalpha [T00105] | 386 | 392 | 4.776286  | AACAATA  | 0.42871 | 0.66566 |
| Sequence | FOXP3 [T04280]      | 178 | 183 | 6.581441  | TAAAAC   | 0.42871 | 0.66949 |
| Sequence | FOXP3 [T04280]      | 318 | 323 | 6.581441  | TAAAAC   | 0.42871 | 0.66949 |
| Sequence | FOXP3 [T04280]      | 852 | 857 | 6.581441  | GTTTTA   | 0.42871 | 0.66949 |
| Sequence | STAT4 [T01577]      | 414 | 419 | 4.411765  | GGAAGC   | 0.85742 | 0.67827 |
| Sequence | FOXP3 [T04280]      | 117 | 122 | 0         | GTTGTT   | 0.64307 | 0.69366 |
| Sequence | ENKTF-1 [T00255]    | 605 | 612 | 12.629773 | ACGTGCCA | 0.9646  | 0.71832 |
| Sequence | ENKTF-1 [T00255]    | 661 | 668 | 12.629773 | GTTAGCCA | 0.9646  | 0.71832 |
| Sequence | ENKTF-1 [T00255]    | 707 | 714 | 12.629773 | TGGCCTCC | 0.9646  | 0.71832 |
| Sequence | TFII-I [T00824]     | 59  | 64  | 11.337888 | TTCTCC   | 1.07178 | 0.73432 |
| Sequence | TFII-I [T00824]     | 565 | 570 | 11.337888 | TTCTCC   | 1.07178 | 0.73432 |

|          |                     |     |     |           |          |         |         |
|----------|---------------------|-----|-----|-----------|----------|---------|---------|
| Sequence | GR [T05076]         | 195 | 201 | 11.290546 | CAAAGTA  | 0.64307 | 0.75811 |
| Sequence | GR [T05076]         | 356 | 362 | 11.290546 | CAAAGGG  | 0.64307 | 0.75811 |
| Sequence | GR [T05076]         | 715 | 721 | 11.290546 | CAAAGTG  | 0.64307 | 0.75811 |
| Sequence | GR [T05076]         | 797 | 803 | 11.290546 | ACCTTTG  | 0.64307 | 0.75811 |
| Sequence | NFI/CTF [T00094]    | 140 | 147 | 14.373419 | TGTATTGG | 0.64307 | 0.76018 |
| Sequence | NFI/CTF [T00094]    | 501 | 508 | 14.373419 | CCAAGTTG | 0.64307 | 0.76018 |
| Sequence | NFI/CTF [T00094]    | 583 | 590 | 14.373419 | CCAAGTAG | 0.64307 | 0.76018 |
| Sequence | GATA-1 [T00306]     | 148 | 153 | 0.280028  | TAGATA   | 0.42871 | 0.78292 |
| Sequence | XBP-1 [T00902]      | 774 | 779 | 11.373637 | ATGGCC   | 0.85742 | 0.79804 |
| Sequence | XBP-1 [T00902]      | 825 | 830 | 11.373637 | TGACAT   | 0.85742 | 0.79804 |
| Sequence | XBP-1 [T00902]      | 516 | 521 | 9.789909  | ATGGCG   | 0.85742 | 0.80282 |
| Sequence | HNF-3alpha [T02512] | 237 | 244 | 7.000129  | GATTTTCA | 0.36172 | 0.83936 |
| Sequence | HNF-3alpha [T02512] | 248 | 255 | 7.000129  | TATTTTTC | 0.36172 | 0.83936 |
| Sequence | HNF-3alpha [T02512] | 278 | 285 | 7.000129  | AATTTTTT | 0.36172 | 0.83936 |
| Sequence | HNF-3alpha [T02512] | 624 | 631 | 7.000129  | AATTTTTT | 0.36172 | 0.83936 |
| Sequence | TFIID [T00820]      | 10  | 16  | 9.552105  | TGGGAAA  | 0.64307 | 0.8781  |
| Sequence | TFIID [T00820]      | 266 | 272 | 9.552105  | TGGGAAA  | 0.64307 | 0.8781  |
| Sequence | TFIID [T00820]      | 401 | 407 | 9.552105  | TGGGAAA  | 0.64307 | 0.8781  |
| Sequence | TFIID [T00820]      | 712 | 718 | 9.552105  | TCCCAA   | 0.64307 | 0.8781  |
| Sequence | STAT4 [T01577]      | 268 | 273 | 1.470588  | GGAAAA   | 0.85742 | 0.96202 |
| Sequence | STAT4 [T01577]      | 403 | 408 | 1.470588  | GGAAAC   | 0.85742 | 0.96202 |
| Sequence | TFIID [T00820]      | 130 | 136 | 4.007279  | TCTTAAA  | 0.4823  | 1.16321 |
| Sequence | TFIID [T00820]      | 283 | 289 | 4.007279  | TTTAATA  | 0.4823  | 1.16321 |
| Sequence | TFIID [T00820]      | 285 | 291 | 4.007279  | TAATAAA  | 0.4823  | 1.16321 |
| Sequence | TFIID [T00820]      | 636 | 642 | 4.007279  | TTTAATA  | 0.4823  | 1.16321 |
| Sequence | TFIID [T00820]      | 853 | 859 | 4.007279  | TTTTAAA  | 0.4823  | 1.16321 |
| Sequence | HNF-3alpha [T02512] | 268 | 275 | 14.000258 | GGAAAATG | 0.72345 | 1.17916 |
| Sequence | TFIID [T00820]      | 169 | 175 | 0         | TTAAAAA  | 0.4823  | 1.20766 |
| Sequence | TFIID [T00820]      | 280 | 286 | 0         | TTTTTTA  | 0.4823  | 1.20766 |
| Sequence | TFIID [T00820]      | 281 | 287 | 0         | TTTTTTAA | 0.4823  | 1.20766 |
| Sequence | TFIID [T00820]      | 316 | 322 | 0         | TTTTAAA  | 0.4823  | 1.20766 |
| Sequence | TFIID [T00820]      | 472 | 478 | 0         | TTTTTTGA | 0.4823  | 1.20766 |
| Sequence | TFIID [T00820]      | 767 | 773 | 0         | TTTTTTTA | 0.4823  | 1.20766 |



|          |                   |     |     |           |         |         |         |
|----------|-------------------|-----|-----|-----------|---------|---------|---------|
| Sequence | TFIID [T00820]    | 768 | 774 | 0         | TTTTTAA | 0.4823  | 1.20766 |
| Sequence | TFIID [T00820]    | 854 | 860 | 0         | TTTAAAA | 0.4823  | 1.20766 |
| Sequence | TFIID [T00820]    | 855 | 861 | 0         | TTAAAAA | 0.4823  | 1.20766 |
| Sequence | STAT4 [T01577]    | 87  | 92  | 2.941176  | GGAAAG  | 1.28613 | 1.21136 |
| Sequence | STAT4 [T01577]    | 155 | 160 | 2.941176  | ACTTCC  | 1.28613 | 1.21136 |
| Sequence | STAT4 [T01577]    | 595 | 600 | 2.941176  | GATTCC  | 1.28613 | 1.21136 |
| Sequence | GR [T05076]       | 231 | 237 | 7.527031  | CCTTTTG | 0.80383 | 1.2539  |
| Sequence | GR [T05076]       | 441 | 447 | 7.527031  | TTGTTTG | 0.80383 | 1.2539  |
| Sequence | GR [T05076]       | 819 | 825 | 7.527031  | CAAACAT | 0.80383 | 1.2539  |
| Sequence | XBP-1 [T00902]    | 187 | 192 | 12.067266 | CAGCAT  | 1.28613 | 1.26892 |
| Sequence | XBP-1 [T00902]    | 1   | 6   | 13.650994 | ATGCTC  | 1.28613 | 1.26912 |
| Sequence | TFII-I [T00824]   | 12  | 17  | 4.756447  | GGAAAT  | 1.28613 | 1.26979 |
| Sequence | TFII-I [T00824]   | 361 | 366 | 4.756447  | GGAAAT  | 1.28613 | 1.26979 |
| Sequence | GATA-1 [T00306]   | 273 | 278 | 1.038567  | ATGATA  | 0.85742 | 1.31089 |
| Sequence | PR B [T00696]     | 69  | 75  | 11.148154 | AACAAGG | 0.9646  | 1.40567 |
| Sequence | PR B [T00696]     | 193 | 199 | 11.148154 | AACAAAG | 0.9646  | 1.40567 |
| Sequence | PR B [T00696]     | 429 | 435 | 11.148154 | TTTTGTT | 0.9646  | 1.40567 |
| Sequence | PR B [T00696]     | 434 | 440 | 11.148154 | TTTTGTT | 0.9646  | 1.40567 |
| Sequence | PR B [T00696]     | 439 | 445 | 11.148154 | TTTTGTT | 0.9646  | 1.40567 |
| Sequence | PR B [T00696]     | 455 | 461 | 11.148154 | TTTTGTT | 0.9646  | 1.40567 |
| Sequence | PR B [T00696]     | 821 | 827 | 11.148154 | AACATGA | 0.9646  | 1.40567 |
| Sequence | PR A [T01661]     | 69  | 75  | 11.148154 | AACAAGG | 0.9646  | 1.40567 |
| Sequence | PR A [T01661]     | 193 | 199 | 11.148154 | AACAAAG | 0.9646  | 1.40567 |
| Sequence | PR A [T01661]     | 429 | 435 | 11.148154 | TTTTGTT | 0.9646  | 1.40567 |
| Sequence | PR A [T01661]     | 434 | 440 | 11.148154 | TTTTGTT | 0.9646  | 1.40567 |
| Sequence | PR A [T01661]     | 439 | 445 | 11.148154 | TTTTGTT | 0.9646  | 1.40567 |
| Sequence | PR A [T01661]     | 455 | 461 | 11.148154 | TTTTGTT | 0.9646  | 1.40567 |
| Sequence | PR A [T01661]     | 821 | 827 | 11.148154 | AACATGA | 0.9646  | 1.40567 |
| Sequence | FOXP3 [T04280]    | 505 | 510 | 11.337888 | GTTGGA  | 1.07178 | 1.43207 |
| Sequence | FOXP3 [T04280]    | 536 | 541 | 11.337888 | TGCAAC  | 1.07178 | 1.43207 |
| Sequence | GR-alpha [T00337] | 63  | 67  | 6.055408  | CCTAA   | 1.71484 | 1.59991 |
| Sequence | GR-alpha [T00337] | 394 | 398 | 6.055408  | CCTGA   | 1.71484 | 1.59991 |
| Sequence | GR-alpha [T00337] | 867 | 871 | 6.055408  | CCTAA   | 1.71484 | 1.59991 |

|          |                   |     |     |          |         |         |         |
|----------|-------------------|-----|-----|----------|---------|---------|---------|
| Sequence | GR-alpha [T00337] | 212 | 216 | 6.263098 | TGAGG   | 1.71484 | 1.602   |
| Sequence | GR-alpha [T00337] | 351 | 355 | 6.263098 | TGAGG   | 1.71484 | 1.602   |
| Sequence | GR-alpha [T00337] | 573 | 577 | 6.263098 | CCTCA   | 1.71484 | 1.602   |
| Sequence | GR-alpha [T00337] | 686 | 690 | 6.263098 | CCTCA   | 1.71484 | 1.602   |
| Sequence | GR-alpha [T00337] | 808 | 812 | 6.263098 | CCTCA   | 1.71484 | 1.602   |
| Sequence | FOXP3 [T04280]    | 66  | 71  | 4.756447 | AAAAAC  | 1.28613 | 1.67589 |
| Sequence | FOXP3 [T04280]    | 424 | 429 | 4.756447 | GTTTTT  | 1.28613 | 1.67589 |
| Sequence | FOXP3 [T04280]    | 433 | 438 | 4.756447 | GTTTTG  | 1.28613 | 1.67589 |
| Sequence | FOXP3 [T04280]    | 438 | 443 | 4.756447 | GTTTTG  | 1.28613 | 1.67589 |
| Sequence | FOXP3 [T04280]    | 452 | 457 | 4.756447 | GTTTTT  | 1.28613 | 1.67589 |
| Sequence | FOXP3 [T04280]    | 469 | 474 | 4.756447 | GTTTTT  | 1.28613 | 1.67589 |
| Sequence | FOXP3 [T04280]    | 764 | 769 | 4.756447 | GTTTTT  | 1.28613 | 1.67589 |
| Sequence | FOXP3 [T04280]    | 813 | 818 | 4.756447 | GTTGAC  | 1.28613 | 1.67589 |
| Sequence | FOXP3 [T04280]    | 857 | 862 | 4.756447 | AAAAAC  | 1.28613 | 1.67589 |
| Sequence | TFIID [T00820]    | 192 | 198 | 8.014558 | TAACAAA | 0.9646  | 1.67898 |
| Sequence | TFIID [T00820]    | 474 | 480 | 8.014558 | TTTGAGA | 0.9646  | 1.67898 |
| Sequence | TFIID [T00820]    | 675 | 681 | 8.014558 | TCTCAA  | 0.9646  | 1.67898 |
| Sequence | TFIID [T00820]    | 830 | 836 | 8.014558 | TCAGAAA | 0.9646  | 1.67898 |
| Sequence | XBP-1 [T00902]    | 113 | 118 | 7.172312 | ATGAGT  | 1.28613 | 1.78303 |
| Sequence | XBP-1 [T00902]    | 136 | 141 | 7.172312 | ATGATG  | 1.28613 | 1.78303 |
| Sequence | XBP-1 [T00902]    | 379 | 384 | 7.172312 | ATGAGT  | 1.28613 | 1.78303 |
| Sequence | XBP-1 [T00902]    | 273 | 278 | 8.75604  | ATGATA  | 1.28613 | 1.80345 |
| Sequence | XBP-1 [T00902]    | 692 | 697 | 8.75604  | ATGATC  | 1.28613 | 1.80345 |
| Sequence | GR-beta [T01920]  | 483 | 487 | 1.680765 | GAATT   | 1.71484 | 2.24807 |
| Sequence | GR-beta [T01920]  | 141 | 145 | 5.042296 | GTATT   | 1.71484 | 2.27076 |
| Sequence | GR-beta [T01920]  | 166 | 170 | 5.042296 | GGATT   | 1.71484 | 2.27076 |
| Sequence | GR-beta [T01920]  | 199 | 203 | 5.042296 | GTATT   | 1.71484 | 2.27076 |
| Sequence | GR-beta [T01920]  | 632 | 636 | 5.042296 | GTATT   | 1.71484 | 2.27076 |
| Sequence | GR-beta [T01920]  | 725 | 729 | 5.042296 | GGATT   | 1.71484 | 2.27076 |
| Sequence | GR-beta [T01920]  | 870 | 874 | 5.042296 | AATAC   | 1.71484 | 2.27076 |
| Sequence | GR-alpha [T00337] | 569 | 573 | 8.073878 | CCTGC   | 3.42969 | 2.27693 |
| Sequence | GR-alpha [T00337] | 599 | 603 | 8.073878 | CCAGG   | 3.42969 | 2.27693 |
| Sequence | GR-alpha [T00337] | 666 | 670 | 8.073878 | CCAGG   | 3.42969 | 2.27693 |

|          |                   |     |     |          |        |         |         |
|----------|-------------------|-----|-----|----------|--------|---------|---------|
| Sequence | GR-alpha [T00337] | 71  | 75  | 8.281568 | CAAGG  | 3.42969 | 2.30629 |
| Sequence | GR-alpha [T00337] | 124 | 128 | 8.281568 | CCTTG  | 3.42969 | 2.30629 |
| Sequence | GR-alpha [T00337] | 293 | 297 | 8.281568 | CAAGG  | 3.42969 | 2.30629 |
| Sequence | GR-alpha [T00337] | 410 | 414 | 8.281568 | CGAGG  | 3.42969 | 2.30629 |
| Sequence | GR-alpha [T00337] | 541 | 545 | 8.281568 | CCTCC  | 3.42969 | 2.30629 |
| Sequence | GR-alpha [T00337] | 547 | 551 | 8.281568 | CCTCC  | 3.42969 | 2.30629 |
| Sequence | GR-alpha [T00337] | 579 | 583 | 8.281568 | CCTCC  | 3.42969 | 2.30629 |
| Sequence | GR-alpha [T00337] | 704 | 708 | 8.281568 | CCTTG  | 3.42969 | 2.30629 |
| Sequence | GR-alpha [T00337] | 710 | 714 | 8.281568 | CCTCC  | 3.42969 | 2.30629 |
| Sequence | GR-alpha [T00337] | 778 | 782 | 8.281568 | CCTTG  | 3.42969 | 2.30629 |
| Sequence | TFII-I [T00824]   | 155 | 160 | 14.26934 | ACTTCC | 2.57227 | 2.322   |
| Sequence | TFII-I [T00824]   | 166 | 171 | 14.26934 | GGATTA | 2.57227 | 2.322   |
| Sequence | TFII-I [T00824]   | 595 | 600 | 14.26934 | GATTCC | 2.57227 | 2.322   |
| Sequence | TFII-I [T00824]   | 725 | 730 | 14.26934 | GGATTA | 2.57227 | 2.322   |
| Sequence | TFII-I [T00824]   | 795 | 800 | 14.26934 | GGACCT | 2.57227 | 2.322   |
| Sequence | TFII-I [T00824]   | 268 | 273 | 9.512894 | GGAAAA | 3.21533 | 2.8057  |
| Sequence | TFII-I [T00824]   | 403 | 408 | 9.512894 | GGAAAC | 3.21533 | 2.8057  |
| Sequence | FOXP3 [T04280]    | 310 | 315 | 14.26934 | CTGAAC | 2.57227 | 2.98215 |
| Sequence | FOXP3 [T04280]    | 403 | 408 | 14.26934 | GGAAAC | 2.57227 | 2.98215 |
| Sequence | FOXP3 [T04280]    | 443 | 448 | 14.26934 | GTTTGG | 2.57227 | 2.98215 |
| Sequence | FOXP3 [T04280]    | 642 | 647 | 14.26934 | AGAAAC | 2.57227 | 2.98215 |
| Sequence | FOXP3 [T04280]    | 818 | 823 | 14.26934 | CCAAAC | 2.57227 | 2.98215 |
| Sequence | FOXP3 [T04280]    | 832 | 837 | 14.26934 | AGAAAC | 2.57227 | 2.98215 |
| Sequence | GR-beta [T01920]  | 14  | 18  | 0        | AAATT  | 1.71484 | 3.16199 |
| Sequence | GR-beta [T01920]  | 15  | 19  | 0        | AATTT  | 1.71484 | 3.16199 |
| Sequence | GR-beta [T01920]  | 224 | 228 | 3.361531 | AATAT  | 1.71484 | 3.16199 |
| Sequence | GR-beta [T01920]  | 278 | 282 | 0        | AATTT  | 1.71484 | 3.16199 |
| Sequence | GR-beta [T01920]  | 484 | 488 | 0        | AATTT  | 1.71484 | 3.16199 |
| Sequence | GR-beta [T01920]  | 624 | 628 | 0        | AATTT  | 1.71484 | 3.16199 |
| Sequence | GR-beta [T01920]  | 842 | 846 | 0        | ACATT  | 1.71484 | 3.16199 |
| Sequence | YY1 [T00915]      | 85  | 88  | 0        | ATGG   | 3.42969 | 3.20191 |
| Sequence | YY1 [T00915]      | 95  | 98  | 0        | ATGG   | 3.42969 | 3.20191 |
| Sequence | YY1 [T00915]      | 263 | 266 | 0        | CCAT   | 3.42969 | 3.20191 |

|          |                   |     |     |          |        |         |         |
|----------|-------------------|-----|-----|----------|--------|---------|---------|
| Sequence | YY1 [T00915]      | 265 | 268 | 0        | ATGG   | 3.42969 | 3.20191 |
| Sequence | YY1 [T00915]      | 304 | 307 | 0        | CCAT   | 3.42969 | 3.20191 |
| Sequence | YY1 [T00915]      | 400 | 403 | 0        | ATGG   | 3.42969 | 3.20191 |
| Sequence | YY1 [T00915]      | 516 | 519 | 0        | ATGG   | 3.42969 | 3.20191 |
| Sequence | YY1 [T00915]      | 774 | 777 | 0        | ATGG   | 3.42969 | 3.20191 |
| Sequence | YY1 [T00915]      | 793 | 796 | 0        | ATGG   | 3.42969 | 3.20191 |
| Sequence | GR-alpha [T00337] | 231 | 235 | 0.207689 | CCTTT  | 3.42969 | 3.27    |
| Sequence | GR-alpha [T00337] | 357 | 361 | 0.207689 | AAAGG  | 3.42969 | 3.27    |
| Sequence | GR-alpha [T00337] | 374 | 378 | 0.207689 | AGAGG  | 3.42969 | 3.27    |
| Sequence | GR-alpha [T00337] | 420 | 424 | 0        | ACAGG  | 3.42969 | 3.27    |
| Sequence | GR-alpha [T00337] | 646 | 650 | 0        | ACAGG  | 3.42969 | 3.27    |
| Sequence | GR-alpha [T00337] | 798 | 802 | 0.207689 | CCTTT  | 3.42969 | 3.27    |
| Sequence | FOXP3 [T04280]    | 98  | 103 | 9.512894 | GTTCTG | 3.21533 | 3.55991 |
| Sequence | FOXP3 [T04280]    | 120 | 125 | 9.512894 | GTTGCC | 3.21533 | 3.55991 |
| Sequence | FOXP3 [T04280]    | 190 | 195 | 9.512894 | CATAAC | 3.21533 | 3.55991 |
| Sequence | FOXP3 [T04280]    | 287 | 292 | 9.512894 | ATAAAC | 3.21533 | 3.55991 |
| Sequence | FOXP3 [T04280]    | 340 | 345 | 9.512894 | GTAAAC | 3.21533 | 3.55991 |
| Sequence | FOXP3 [T04280]    | 383 | 388 | 9.512894 | GTAAAC | 3.21533 | 3.55991 |
| Sequence | FOXP3 [T04280]    | 389 | 394 | 9.512894 | AATAAC | 3.21533 | 3.55991 |
| Sequence | FOXP3 [T04280]    | 459 | 464 | 9.512894 | GTTCTT | 3.21533 | 3.55991 |
| Sequence | FOXP3 [T04280]    | 496 | 501 | 9.512894 | GTTGCC | 3.21533 | 3.55991 |
| Sequence | GR-beta [T01920]  | 84  | 88  | 0.840383 | AATGG  | 3.42969 | 5.43758 |
| Sequence | GR-beta [T01920]  | 94  | 98  | 0.840383 | AATGG  | 3.42969 | 5.43758 |
| Sequence | GR-beta [T01920]  | 112 | 116 | 0.840383 | AATGA  | 3.42969 | 5.43758 |
| Sequence | GR-beta [T01920]  | 135 | 139 | 0.840383 | AATGA  | 3.42969 | 5.43758 |
| Sequence | GR-beta [T01920]  | 272 | 276 | 0.840383 | AATGA  | 3.42969 | 5.43758 |
| Sequence | GR-beta [T01920]  | 277 | 281 | 0.840383 | TAATT  | 3.42969 | 5.43758 |
| Sequence | GR-beta [T01920]  | 364 | 368 | 0.840383 | AATGA  | 3.42969 | 5.43758 |
| Sequence | GR-beta [T01920]  | 399 | 403 | 0.840383 | AATGG  | 3.42969 | 5.43758 |
| Sequence | GR-beta [T01920]  | 515 | 519 | 0.840383 | AATGG  | 3.42969 | 5.43758 |
| Sequence | GR-beta [T01920]  | 623 | 627 | 0.840383 | TAATT  | 3.42969 | 5.43758 |
| Sequence | GR-beta [T01920]  | 773 | 777 | 0.840383 | AATGG  | 3.42969 | 5.43758 |
| Sequence | GR-beta [T01920]  | 236 | 240 | 4.201913 | TGATT  | 3.42969 | 5.53089 |

|          |                    |     |     |          |       |         |         |
|----------|--------------------|-----|-----|----------|-------|---------|---------|
| Sequence | GR-beta [T01920]   | 247 | 251 | 4.201913 | CTATT | 3.42969 | 5.53089 |
| Sequence | GR-beta [T01920]   | 286 | 290 | 4.201913 | AATAA | 3.42969 | 5.53089 |
| Sequence | GR-beta [T01920]   | 345 | 349 | 4.201913 | CGATT | 3.42969 | 5.53089 |
| Sequence | GR-beta [T01920]   | 389 | 393 | 4.201913 | AATAA | 3.42969 | 5.53089 |
| Sequence | GR-beta [T01920]   | 562 | 566 | 4.201913 | CGATT | 3.42969 | 5.53089 |
| Sequence | GR-beta [T01920]   | 594 | 598 | 4.201913 | TGATT | 3.42969 | 5.53089 |
| Sequence | GR-beta [T01920]   | 639 | 643 | 4.201913 | AATAG | 3.42969 | 5.53089 |
| Sequence | C/EBPbeta [T00581] | 82  | 85  | 1.639871 | CCAA  | 6.85938 | 7.77501 |
| Sequence | C/EBPbeta [T00581] | 126 | 129 | 1.366559 | TTGA  | 6.85938 | 7.77501 |
| Sequence | C/EBPbeta [T00581] | 144 | 147 | 1.639871 | TTGG  | 6.85938 | 7.77501 |
| Sequence | C/EBPbeta [T00581] | 160 | 163 | 1.639871 | CCAA  | 6.85938 | 7.77501 |
| Sequence | C/EBPbeta [T00581] | 221 | 224 | 1.366559 | TTGA  | 6.85938 | 7.77501 |
| Sequence | C/EBPbeta [T00581] | 235 | 238 | 1.366559 | TTGA  | 6.85938 | 7.77501 |
| Sequence | C/EBPbeta [T00581] | 292 | 295 | 1.639871 | CCAA  | 6.85938 | 7.77501 |
| Sequence | C/EBPbeta [T00581] | 445 | 448 | 1.639871 | TTGG  | 6.85938 | 7.77501 |
| Sequence | C/EBPbeta [T00581] | 464 | 467 | 1.639871 | TTGG  | 6.85938 | 7.77501 |
| Sequence | C/EBPbeta [T00581] | 475 | 478 | 1.366559 | TTGA  | 6.85938 | 7.77501 |
| Sequence | C/EBPbeta [T00581] | 501 | 504 | 1.639871 | CCAA  | 6.85938 | 7.77501 |
| Sequence | C/EBPbeta [T00581] | 506 | 509 | 1.639871 | TTGG  | 6.85938 | 7.77501 |
| Sequence | C/EBPbeta [T00581] | 527 | 530 | 1.639871 | TTGG  | 6.85938 | 7.77501 |
| Sequence | C/EBPbeta [T00581] | 557 | 560 | 1.366559 | TCAA  | 6.85938 | 7.77501 |
| Sequence | C/EBPbeta [T00581] | 583 | 586 | 1.639871 | CCAA  | 6.85938 | 7.77501 |
| Sequence | C/EBPbeta [T00581] | 677 | 680 | 1.366559 | TCAA  | 6.85938 | 7.77501 |
| Sequence | C/EBPbeta [T00581] | 706 | 709 | 1.639871 | TTGG  | 6.85938 | 7.77501 |
| Sequence | C/EBPbeta [T00581] | 714 | 717 | 1.639871 | CCAA  | 6.85938 | 7.77501 |
| Sequence | C/EBPbeta [T00581] | 814 | 817 | 1.366559 | TTGA  | 6.85938 | 7.77501 |
| Sequence | C/EBPbeta [T00581] | 818 | 821 | 1.639871 | CCAA  | 6.85938 | 7.77501 |
| Sequence | C/EBPbeta [T00581] | 18  | 21  | 0        | TTGT  | 6.85938 | 7.94956 |
| Sequence | C/EBPbeta [T00581] | 24  | 27  | 0        | TTGT  | 6.85938 | 7.94956 |
| Sequence | C/EBPbeta [T00581] | 70  | 73  | 0        | ACAA  | 6.85938 | 7.94956 |
| Sequence | C/EBPbeta [T00581] | 118 | 121 | 0        | TTGT  | 6.85938 | 7.94956 |
| Sequence | C/EBPbeta [T00581] | 121 | 124 | 0        | TTGC  | 6.85938 | 7.94956 |
| Sequence | C/EBPbeta [T00581] | 194 | 197 | 0        | ACAA  | 6.85938 | 7.94956 |

|          |                    |     |     |   |      |         |         |
|----------|--------------------|-----|-----|---|------|---------|---------|
| Sequence | C/EBPbeta [T00581] | 355 | 358 | 0 | GCAA | 6.85938 | 7.94956 |
| Sequence | C/EBPbeta [T00581] | 387 | 390 | 0 | ACAA | 6.85938 | 7.94956 |
| Sequence | C/EBPbeta [T00581] | 431 | 434 | 0 | TTGT | 6.85938 | 7.94956 |
| Sequence | C/EBPbeta [T00581] | 436 | 439 | 0 | TTGT | 6.85938 | 7.94956 |
| Sequence | C/EBPbeta [T00581] | 441 | 444 | 0 | TTGT | 6.85938 | 7.94956 |
| Sequence | C/EBPbeta [T00581] | 457 | 460 | 0 | TTGT | 6.85938 | 7.94956 |
| Sequence | C/EBPbeta [T00581] | 497 | 500 | 0 | TTGC | 6.85938 | 7.94956 |
| Sequence | C/EBPbeta [T00581] | 513 | 516 | 0 | GCAA | 6.85938 | 7.94956 |
| Sequence | C/EBPbeta [T00581] | 537 | 540 | 0 | GCAA | 6.85938 | 7.94956 |
| Sequence | C/EBPbeta [T00581] | 630 | 633 | 0 | TTGT | 6.85938 | 7.94956 |
| Sequence | C/EBPbeta [T00581] | 780 | 783 | 0 | TTGC | 6.85938 | 7.94956 |
| Sequence | C/EBPbeta [T00581] | 801 | 804 | 0 | TTGC | 6.85938 | 7.94956 |
| Sequence | C/EBPbeta [T00581] | 846 | 849 | 0 | TTGT | 6.85938 | 7.94956 |

---
