# Supplementary material
Source: PubMed Central journal article supplement (PMC6361596)
Supplement: ijvr-19-262.s003.pdf [file ijvr-19-262.s003.pdf]

**ST3:** List of the predicted binding sites for the transcription factors known to control autophagy

| Sequence name | Factor name                   | Start position | End position | Dissimilarity | String       | RE equally | RE query |
|---------------|-------------------------------|----------------|--------------|---------------|--------------|------------|----------|
| Sequence      | NF-kappaB [T00590]            | 401            | 412          | 11.379879     | TGGGAAACTCGA | 0.009      | 0.00704  |
| Sequence      | HIF-1 [T01609]                | 605            | 613          | 2.735708      | ACGTGCCAC    | 0.0201     | 0.01428  |
| Sequence      | HIF-1 [T01609]                | 600            | 608          | 1.730353      | CAGGCACGT    | 0.04019    | 0.0242   |
| Sequence      | p53 [T00671]                  | 745            | 751          | 4.645444      | CGCGCCC      | 0.10718    | 0.03485  |
| Sequence      | PPAR-alpha:RXR-alpha [T05221] | 497            | 507          | 14.659739     | TTGCCCAAGTT  | 0.06782    | 0.05126  |
| Sequence      | E2F-1 [T01542]                | 693            | 700          | 10.134154     | TGATCCGC     | 0.14737    | 0.06899  |
| Sequence      | E2F-1 [T01542]                | 540            | 547          | 12.813402     | ACCTCCGC     | 0.20096    | 0.07366  |
| Sequence      | E2F-1 [T01542]                | 697            | 704          | 11.888116     | CCGCCCGC     | 0.20096    | 0.07989  |
| Sequence      | p53 [T00671]                  | 696            | 702          | 5.133514      | TCCGCC       | 0.21436    | 0.09784  |
| Sequence      | p53 [T00671]                  | 496            | 502          | 3.024997      | GTTGCC       | 0.21436    | 0.10711  |
| Sequence      | p53 [T00671]                  | 803            | 809          | 2.813291      | GCTGCC       | 0.21436    | 0.10711  |
| Sequence      | E2F-1 [T01542]                | 740            | 747          | 13.578236     | GCCACCGC     | 0.32153    | 0.14301  |
| Sequence      | PR B [T00696]                 | 760            | 766          | 0             | CACTGTT      | 0.16077    | 0.19738  |
| Sequence      | PR B [T00696]                 | 835            | 841          | 8.827054      | AACAGAT      | 0.16077    | 0.19738  |
| Sequence      | PR B [T00696]                 | 860            | 866          | 8.827054      | AACAGCT      | 0.16077    | 0.19738  |
| Sequence      | XBP-1 [T00902]                | 365            | 370          | 0             | ATGACT       | 0.42871    | 0.4661   |
| Sequence      | XBP-1 [T00902]                | 824            | 829          | 1.583727      | ATGACA       | 0.42871    | 0.47108  |
| Sequence      | PR B [T00696]                 | 657            | 663          | 9.743489      | CCGTGTT      | 0.4823     | 0.49677  |
| Sequence      | PR B [T00696]                 | 848            | 854          | 9.743489      | GTGTGTT      | 0.4823     | 0.49677  |
| Sequence      | PR B [T00696]                 | 99             | 105          | 8.338824      | TTCTGTT      | 0.4823     | 0.49869  |
| Sequence      | PR B [T00696]                 | 645            | 651          | 8.338824      | AACAGGG      | 0.4823     | 0.49869  |
| Sequence      | GATA-1 [T00306]               | 226            | 231          | 0.105011      | TATCTC       | 0.42871    | 0.55444  |
| Sequence      | GATA-1 [T00306]               | 837            | 842          | 0             | CAGATA       | 0.42871    | 0.55444  |
| Sequence      | PR B [T00696]                 | 116            | 122          | 11.636384     | AGTTGTT      | 0.32153    | 0.55675  |
| Sequence      | PR B [T00696]                 | 386            | 392          | 2.80933       | AACAATA      | 0.32153    | 0.55675  |
| Sequence      | GATA-1 [T00306]               | 148            | 153          | 0.280028      | TAGATA       | 0.42871    | 0.78292  |
| Sequence      | XBP-1 [T00902]                | 774            | 779          | 11.373637     | ATGGCC       | 0.85742    | 0.79804  |
| Sequence      | XBP-1 [T00902]                | 825            | 830          | 11.373637     | TGACAT       | 0.85742    | 0.79804  |
| Sequence      | XBP-1 [T00902]                | 516            | 521          | 9.789909      | ATGGCG       | 0.85742    | 0.80282  |
| Sequence      | XBP-1 [T00902]                | 187            | 192          | 12.067266     | CAGCAT       | 1.28613    | 1.26892  |
| Sequence      | XBP-1 [T00902]                | 1              | 6            | 13.650994     | ATGCTC       | 1.28613    | 1.26912  |
| Sequence      | GATA-1 [T00306]               | 273            | 278          | 1.038567      | ATGATA       | 0.85742    | 1.31089  |

|          |                    |     |     |           |         |         |         |
|----------|--------------------|-----|-----|-----------|---------|---------|---------|
| Sequence | PR B [T00696]      | 69  | 75  | 11.148154 | AACAAGG | 0.9646  | 1.40567 |
| Sequence | PR B [T00696]      | 193 | 199 | 11.148154 | AACAAAG | 0.9646  | 1.40567 |
| Sequence | PR B [T00696]      | 429 | 435 | 11.148154 | TTTTGTT | 0.9646  | 1.40567 |
| Sequence | PR B [T00696]      | 434 | 440 | 11.148154 | TTTTGTT | 0.9646  | 1.40567 |
| Sequence | PR B [T00696]      | 439 | 445 | 11.148154 | TTTTGTT | 0.9646  | 1.40567 |
| Sequence | PR B [T00696]      | 455 | 461 | 11.148154 | TTTTGTT | 0.9646  | 1.40567 |
| Sequence | PR B [T00696]      | 821 | 827 | 11.148154 | AACATGA | 0.9646  | 1.40567 |
| Sequence | XBP-1 [T00902]     | 113 | 118 | 7.172312  | ATGAGT  | 1.28613 | 1.78303 |
| Sequence | XBP-1 [T00902]     | 136 | 141 | 7.172312  | ATGATG  | 1.28613 | 1.78303 |
| Sequence | XBP-1 [T00902]     | 379 | 384 | 7.172312  | ATGAGT  | 1.28613 | 1.78303 |
| Sequence | XBP-1 [T00902]     | 273 | 278 | 8.75604   | ATGATA  | 1.28613 | 1.80345 |
| Sequence | XBP-1 [T00902]     | 692 | 697 | 8.75604   | ATGATC  | 1.28613 | 1.80345 |
| Sequence | C/EBPbeta [T00581] | 82  | 85  | 1.639871  | CCAA    | 6.85938 | 7.77501 |
| Sequence | C/EBPbeta [T00581] | 126 | 129 | 1.366559  | TTGA    | 6.85938 | 7.77501 |
| Sequence | C/EBPbeta [T00581] | 144 | 147 | 1.639871  | TTGG    | 6.85938 | 7.77501 |
| Sequence | C/EBPbeta [T00581] | 160 | 163 | 1.639871  | CCAA    | 6.85938 | 7.77501 |
| Sequence | C/EBPbeta [T00581] | 221 | 224 | 1.366559  | TTGA    | 6.85938 | 7.77501 |
| Sequence | C/EBPbeta [T00581] | 235 | 238 | 1.366559  | TTGA    | 6.85938 | 7.77501 |
| Sequence | C/EBPbeta [T00581] | 292 | 295 | 1.639871  | CCAA    | 6.85938 | 7.77501 |
| Sequence | C/EBPbeta [T00581] | 445 | 448 | 1.639871  | TTGG    | 6.85938 | 7.77501 |
| Sequence | C/EBPbeta [T00581] | 464 | 467 | 1.639871  | TTGG    | 6.85938 | 7.77501 |
| Sequence | C/EBPbeta [T00581] | 475 | 478 | 1.366559  | TTGA    | 6.85938 | 7.77501 |
| Sequence | C/EBPbeta [T00581] | 501 | 504 | 1.639871  | CCAA    | 6.85938 | 7.77501 |
| Sequence | C/EBPbeta [T00581] | 506 | 509 | 1.639871  | TTGG    | 6.85938 | 7.77501 |
| Sequence | C/EBPbeta [T00581] | 527 | 530 | 1.639871  | TTGG    | 6.85938 | 7.77501 |
| Sequence | C/EBPbeta [T00581] | 557 | 560 | 1.366559  | TCAA    | 6.85938 | 7.77501 |
| Sequence | C/EBPbeta [T00581] | 583 | 586 | 1.639871  | CCAA    | 6.85938 | 7.77501 |
| Sequence | C/EBPbeta [T00581] | 677 | 680 | 1.366559  | TCAA    | 6.85938 | 7.77501 |
| Sequence | C/EBPbeta [T00581] | 706 | 709 | 1.639871  | TTGG    | 6.85938 | 7.77501 |
| Sequence | C/EBPbeta [T00581] | 714 | 717 | 1.639871  | CCAA    | 6.85938 | 7.77501 |
| Sequence | C/EBPbeta [T00581] | 814 | 817 | 1.366559  | TTGA    | 6.85938 | 7.77501 |
| Sequence | C/EBPbeta [T00581] | 818 | 821 | 1.639871  | CCAA    | 6.85938 | 7.77501 |
| Sequence | C/EBPbeta [T00581] | 18  | 21  | 0         | TTGT    | 6.85938 | 7.94956 |
| Sequence | C/EBPbeta [T00581] | 24  | 27  | 0         | TTGT    | 6.85938 | 7.94956 |

|          |                    |     |     |   |      |         |         |
|----------|--------------------|-----|-----|---|------|---------|---------|
| Sequence | C/EBPbeta [T00581] | 70  | 73  | 0 | ACAA | 6.85938 | 7.94956 |
| Sequence | C/EBPbeta [T00581] | 118 | 121 | 0 | TTGT | 6.85938 | 7.94956 |
| Sequence | C/EBPbeta [T00581] | 121 | 124 | 0 | TTGC | 6.85938 | 7.94956 |
| Sequence | C/EBPbeta [T00581] | 194 | 197 | 0 | ACAA | 6.85938 | 7.94956 |
| Sequence | C/EBPbeta [T00581] | 355 | 358 | 0 | GCAA | 6.85938 | 7.94956 |
| Sequence | C/EBPbeta [T00581] | 387 | 390 | 0 | ACAA | 6.85938 | 7.94956 |
| Sequence | C/EBPbeta [T00581] | 431 | 434 | 0 | TTGT | 6.85938 | 7.94956 |
| Sequence | C/EBPbeta [T00581] | 436 | 439 | 0 | TTGT | 6.85938 | 7.94956 |
| Sequence | C/EBPbeta [T00581] | 441 | 444 | 0 | TTGT | 6.85938 | 7.94956 |
| Sequence | C/EBPbeta [T00581] | 457 | 460 | 0 | TTGT | 6.85938 | 7.94956 |
| Sequence | C/EBPbeta [T00581] | 497 | 500 | 0 | TTGC | 6.85938 | 7.94956 |
| Sequence | C/EBPbeta [T00581] | 513 | 516 | 0 | GCAA | 6.85938 | 7.94956 |
| Sequence | C/EBPbeta [T00581] | 537 | 540 | 0 | GCAA | 6.85938 | 7.94956 |
| Sequence | C/EBPbeta [T00581] | 630 | 633 | 0 | TTGT | 6.85938 | 7.94956 |
| Sequence | C/EBPbeta [T00581] | 780 | 783 | 0 | TTGC | 6.85938 | 7.94956 |
| Sequence | C/EBPbeta [T00581] | 801 | 804 | 0 | TTGC | 6.85938 | 7.94956 |
| Sequence | C/EBPbeta [T00581] | 846 | 849 | 0 | TTGT | 6.85938 | 7.94956 |

---

---

Source

---

Tamatani et al. (1999); Shaw et al. (2008); B Copetti et al. (2009); Ling et al. (2012); Lin et al. (2015)  
Zhang et al. (2008); Bellot et al. (2009)  
Zhang et al. (2008); Bellot et al. (2009)  
Gao et al. (2011); Kenzelmann Broz et al. (2013)  
Lee et al. (2014)  
Polager et al. (2008)  
Polager et al. (2008)  
Polager et al. (2010)  
Gao et al. (2011); Kenzelmann Broz et al. (2013)  
Gao et al. (2011); Kenzelmann Broz et al. (2013)  
Gao et al. (2011); Kenzelmann Broz et al. (2013)  
Polager et al. (2008)  
Tracy et al. (2007)  
Tracy et al. (2007)  
Tracy et al. (2007)  
Margariti et al. (2013)  
Margariti et al. (2013)  
Tracy et al. (2007)  
Kang et al. (2012)  
Kang et al. (2012)  
Tracy et al. (2007)  
Tracy et al. (2007)  
Kang et al. (2012)  
Margariti et al. (2013)  
Kang et al. (2012)
